# Supplementary material for: multicrispr: gRNA design for prime editing and parallel targeting of thousands of targets
Source: Life Sci Alliance. 2020 Sep 9;3(11):e202000757. doi: 10.26508/lsa.202000757 (PMC7494814; doi:10.26508/lsa.202000757)
Supplement: Supplementary file 1 [file LSA-2020-00757_TableS1.xlsx]

## Sheet: Sheet1
Tool	Parameters
CHOPCHOP	--fasta
	-G mm10
	-t WHOLE
	-v 2
	-scoringMethod DOENCH_2016
	-BED -GenBank
CRISPOR	mm10 -mm=2 --effScores=fusi
CCTop	--totalMM 2 --coreMM 2
CRISPRseek	findgRNAsWithREcutOnly = FALSE
	findPairedgRNAOnly = FALSE
	format = "bed"
	BSgenomeName = BSgenome.Mmusculus.UCSC.mm10
	chromToSearch = "all"
	txdb = TxDb.Mmusculus.UCSC.mm10.knownGene
	rule.set = "Root_RuleSet2_2016"
	annotatePaired = FALSE
	PAM.pattern = "NGG$"
	allowed.mismatch.PAM = 1
	topN = 1000000,
	annotateExon = FALSE
	fetchSequence = FALSE
	max.mismatch = 2
multicrispr	bsgenome = BSgenome.Mmusculus.UCSC.mm10
	ontargetmethod = 'Doench2016'
